# Supplementary material for: Increased EphA4-ephexin1 signaling in the medial prefrontal cortex plays a role in depression-like phenotype
Source: PubMed Central journal article supplement (PMC5541046; doi:10.1038/s41598-017-07325-2), 2017-08-02

## Supplemental Information

### Increased EphA4-ephexin1 signaling in the medial prefrontal cortex plays a role in depression-like phenotype

Ji-chun Zhang,<sup>a</sup> Wei Yao,<sup>a</sup> Youge Qu,<sup>a</sup> Mayumi Nakamura<sup>b</sup>, Chao Dong,<sup>a</sup>

Chun Yang,<sup>a</sup> Qian Ren,<sup>a</sup> Min Ma,<sup>a</sup> Mei Han,<sup>a</sup> Yukihiro Shirayama,<sup>a,c</sup>

Akiko Hayashi-Takagi,<sup>b,d</sup> and Kenji Hashimoto<sup>a,\*</sup>

**Affiliations:** <sup>a</sup>Division of Clinical Neuroscience, Chiba University Center for Forensic Mental Health, Chiba 260-8670, Japan; <sup>b</sup>Laboratory of Medical Neuroscience, Institute for Molecular and Cellular Regulation, Gunma University, Gunma 371-8511, Japan; <sup>c</sup>Department of Psychiatry, Teikyo University Chiba Medical Center, Ichihara, Chiba 299-0111, Japan; <sup>d</sup>PRESTO, Japan Science and Technology Agency, 4-1-8 Honcho, Kawaguchi, Saitama 332-0012, Japan

\***Corresponding author:** Dr. Kenji Hashimoto, Division of Clinical Neuroscience, Chiba University Center for Forensic Mental Health, 1-8-1 Inohana, Chiba 260-8670, Japan. Tel: +81-43-226-2587 (hashimoto@faculty.chiba-u.jp)

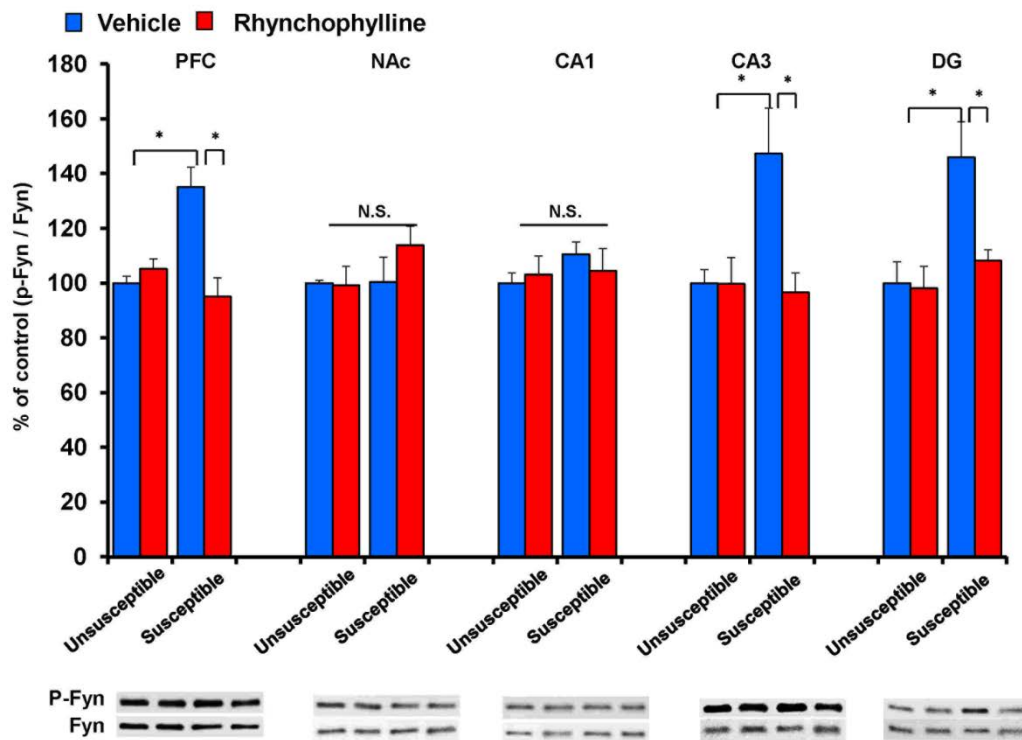

**Figure S1.** The p-Fyn/Fyn ratio in the brain regions of susceptible mice after social defeat stress. The values represent the mean  $\pm$  S.E.M. (n = 6). \*P < 0.05 compared with the vehicle + susceptible group. N.S.: not significant.

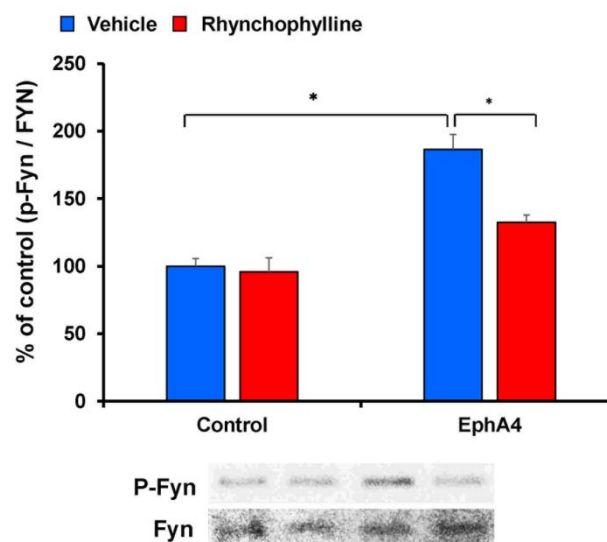

**Figure S2.** The p-Fyn/Fyn ratio in the PFC of mice after AAV vector injection. The values represent the mean  $\pm$  S.E.M. (n = 6). \*P < 0.05 compared with the vehicle + EphA4 group.

Figure S3. The original blots of Western blot analyses in the figure 1.

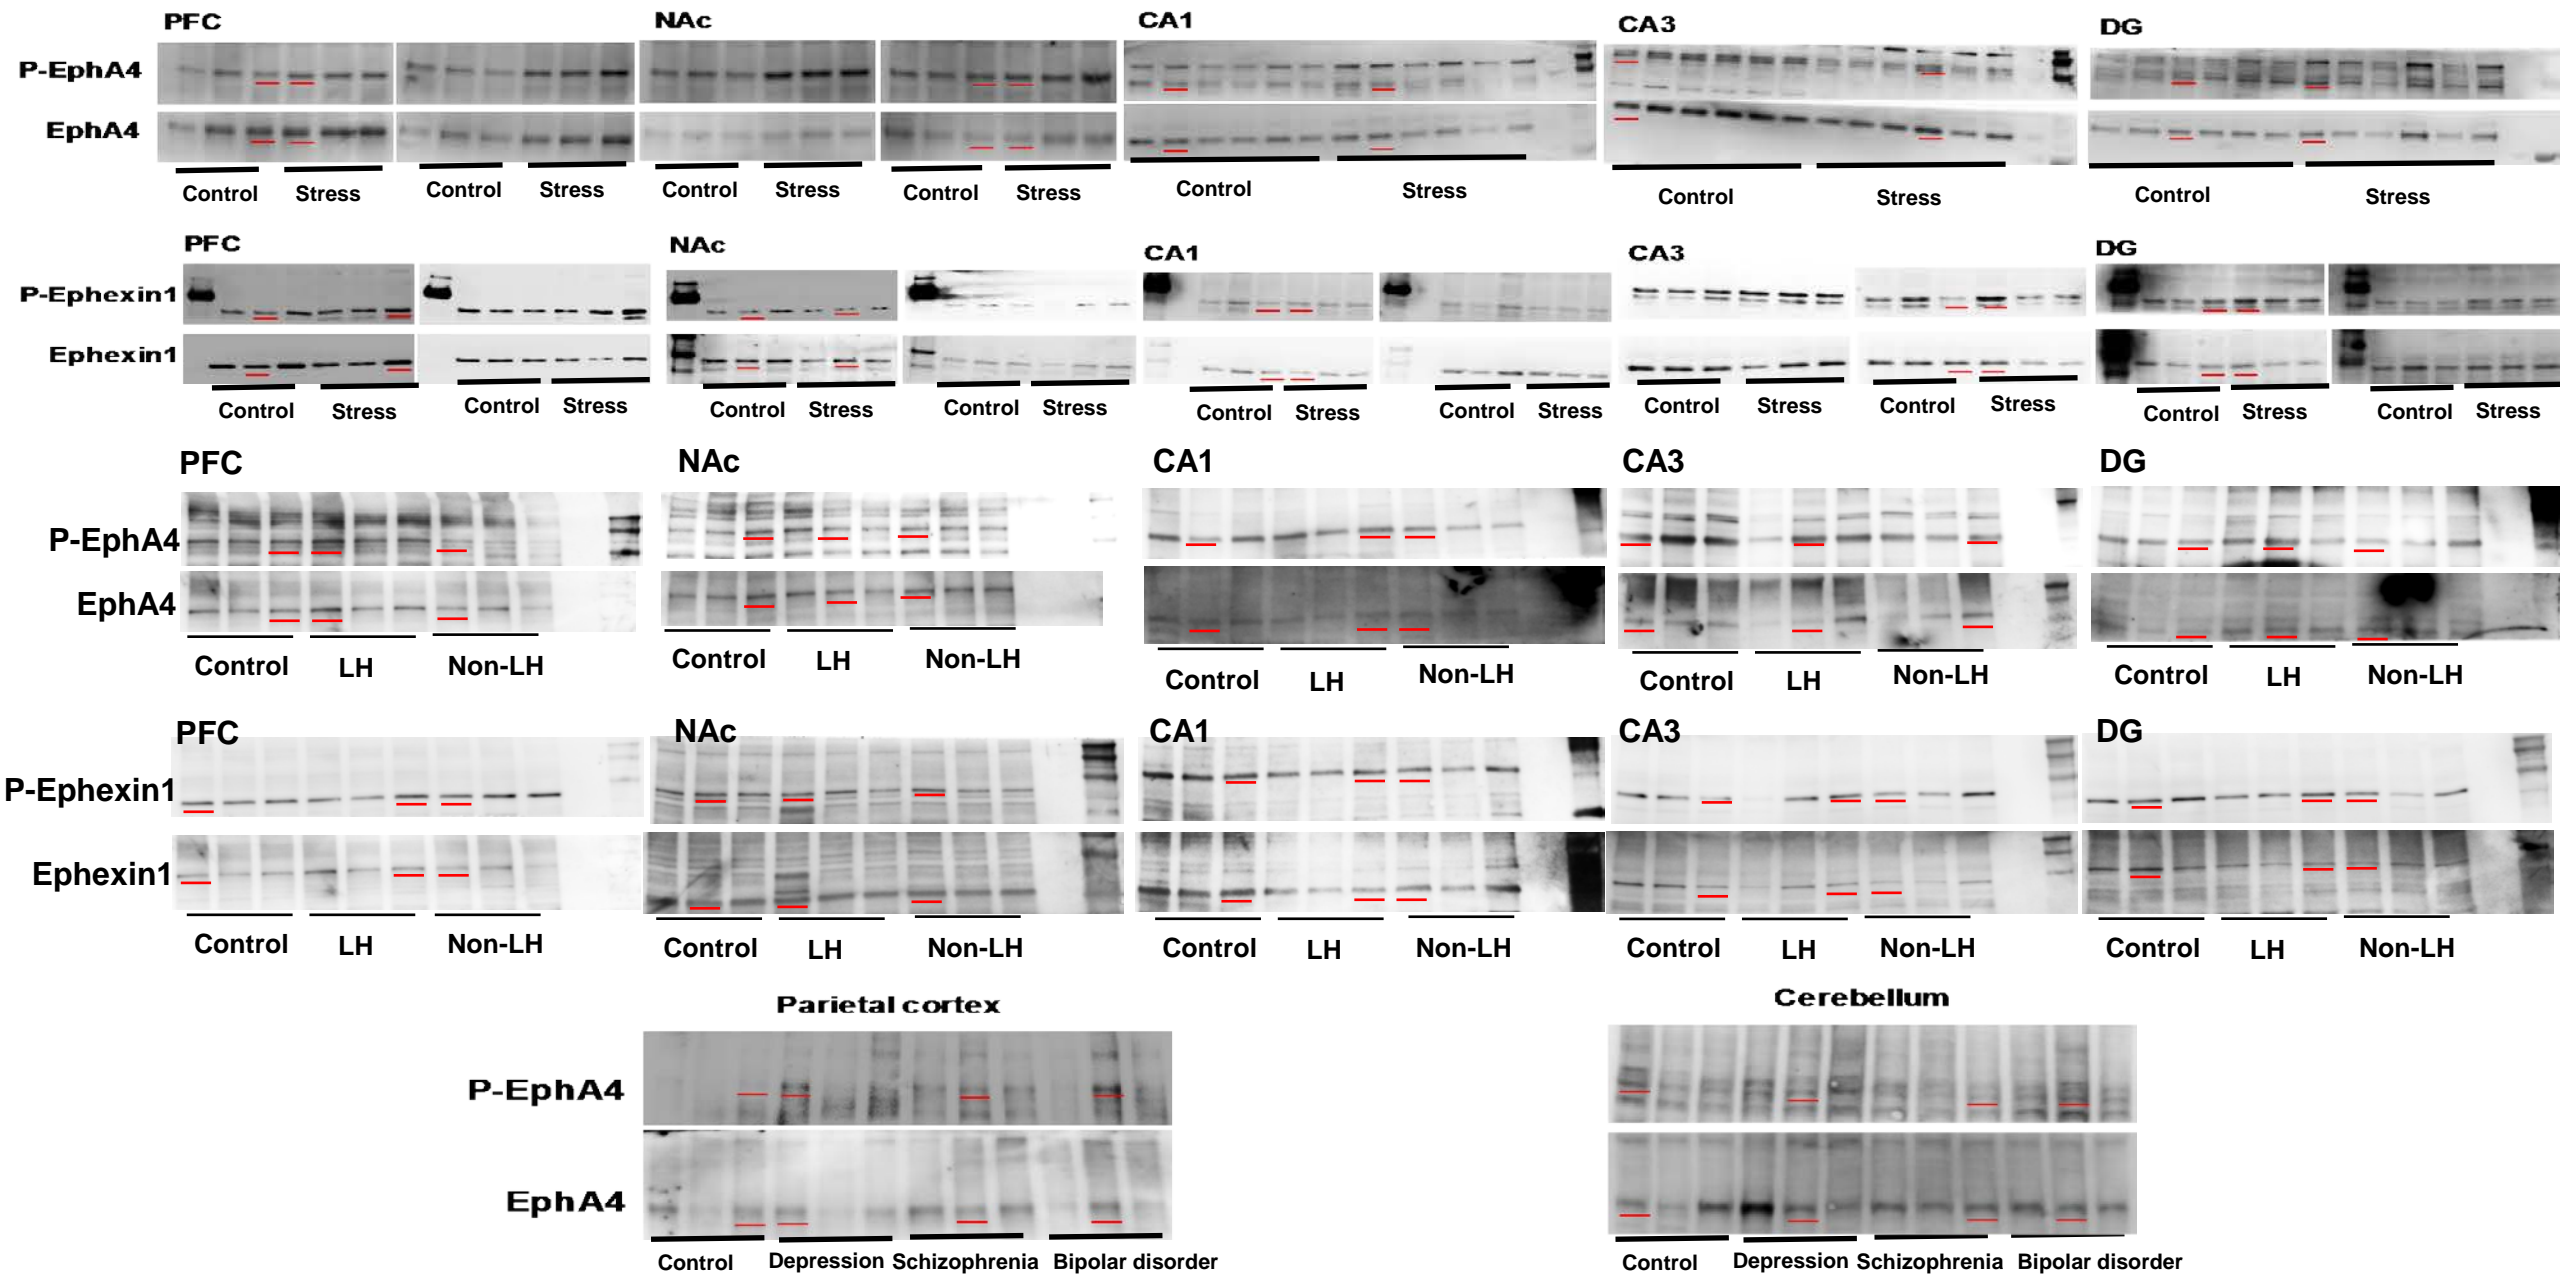

**Figure S4.** The original blots of Western blot analyses in the figure 3.

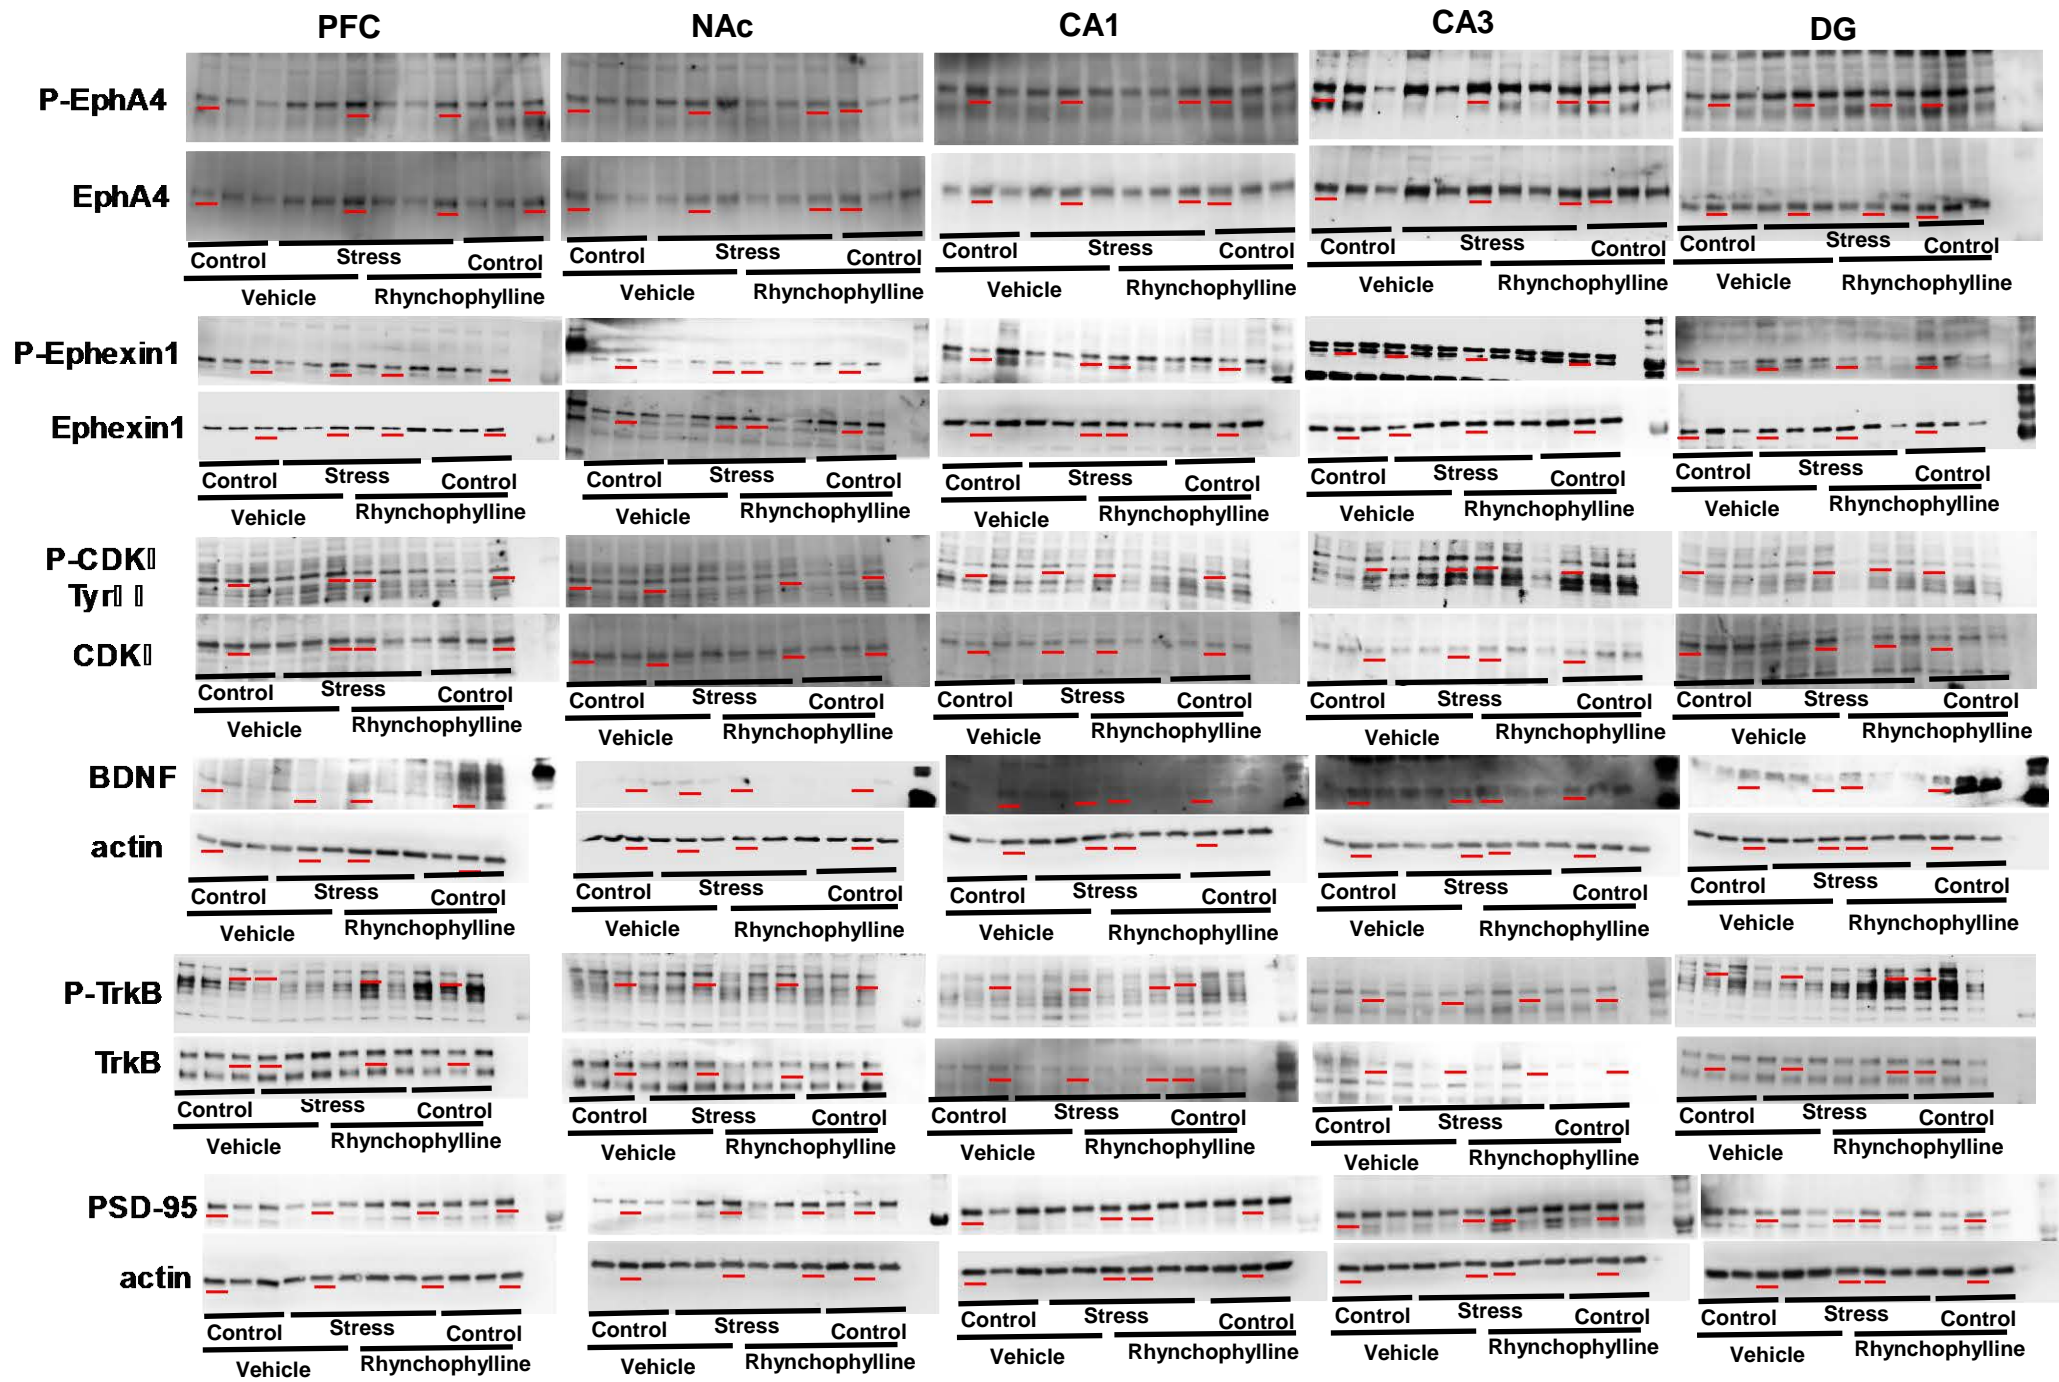

Figure S5. The original blots of Western blot analyses in the figure 5.

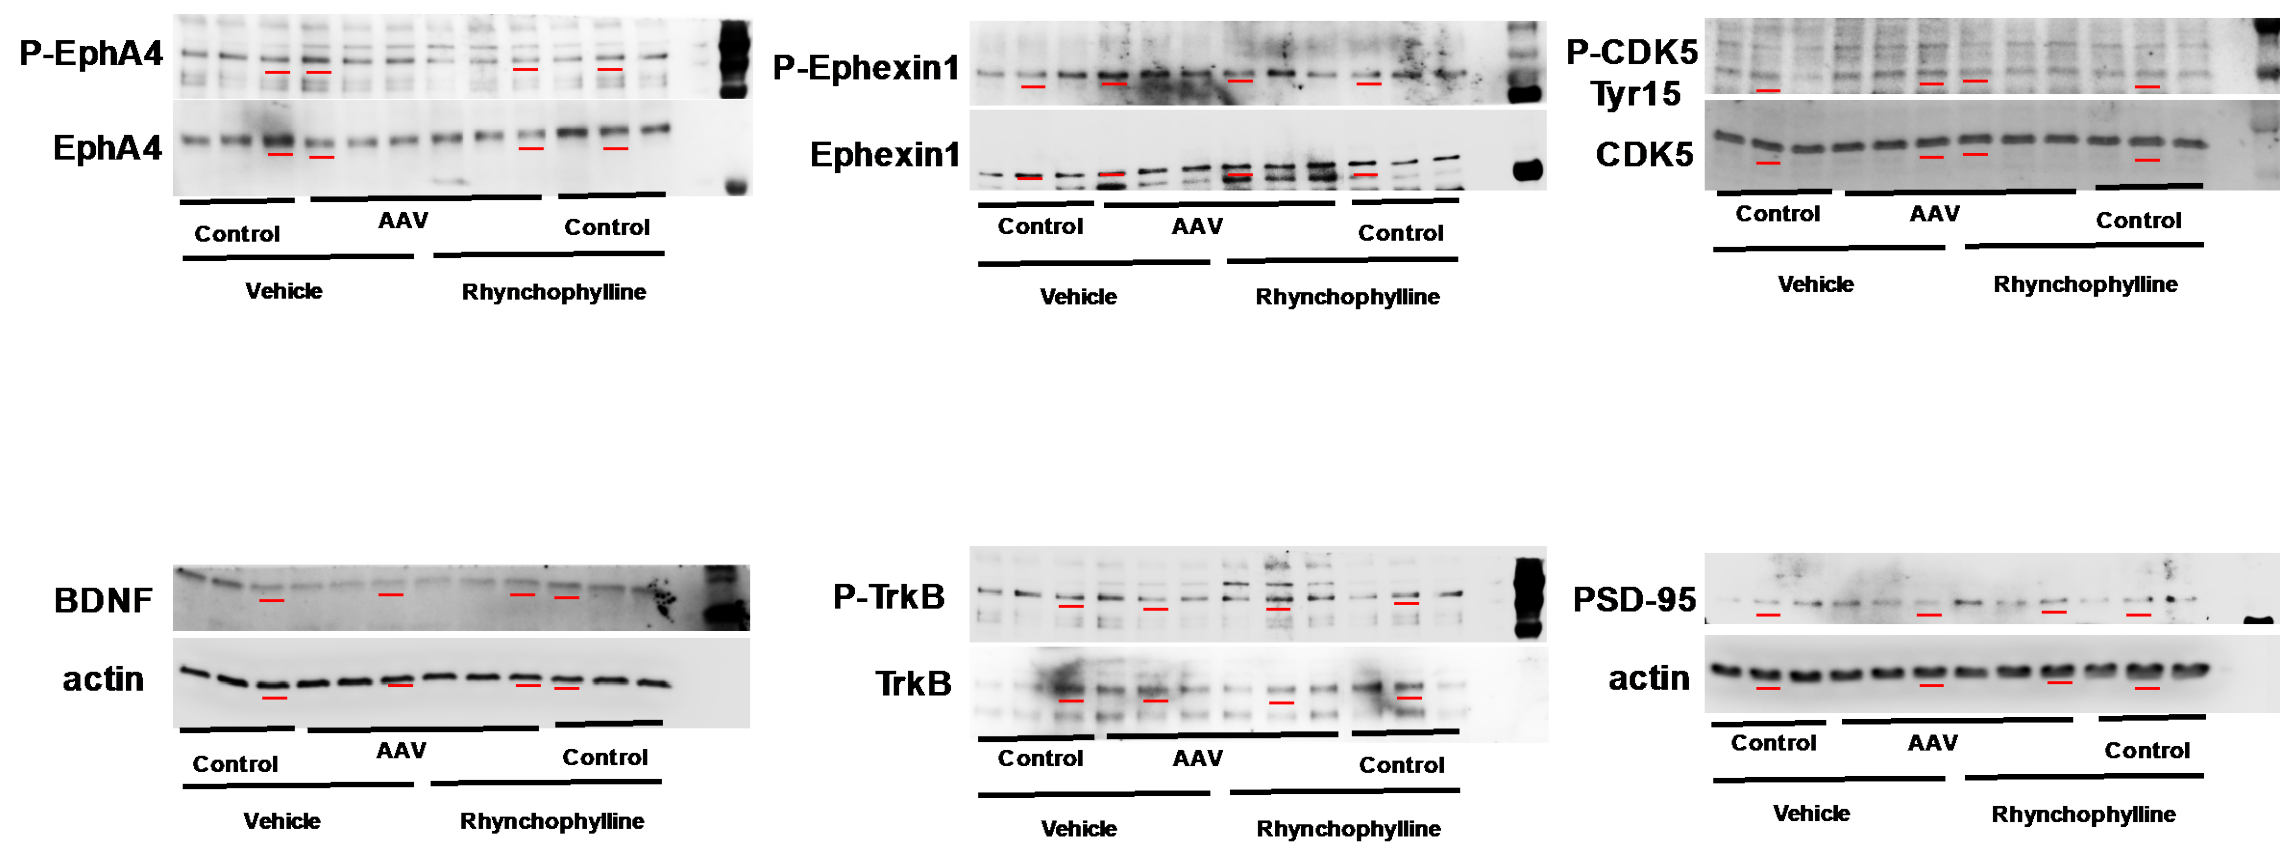

Supplement: 41598_2017_7325_MOESM1_ESM.pdf [file 41598_2017_7325_MOESM1_ESM.pdf]
